# Supplementary material
Source: PubMed Central journal article supplement (PMC9357151)
Supplement: NIHMS1823622-supplement-9.pdf [file NIHMS1823622-supplement-9.pdf]

**Molecular Cell**

**Supplemental information**

**Allosteric control of Type I-A CRISPR-Cas3 complexes and  
establishment as effective nucleic acid detection and human  
genome editing tools**

Chunyi Hu, Dongchun Ni, Ki Hyun Nam, Sonali Majumdar, Justin McLean, Henning Stahlberg, Michael P Terns, and Ailong Ke

**Supplemental Figures S1-S10**

**Supplemental Tables S1-S3**

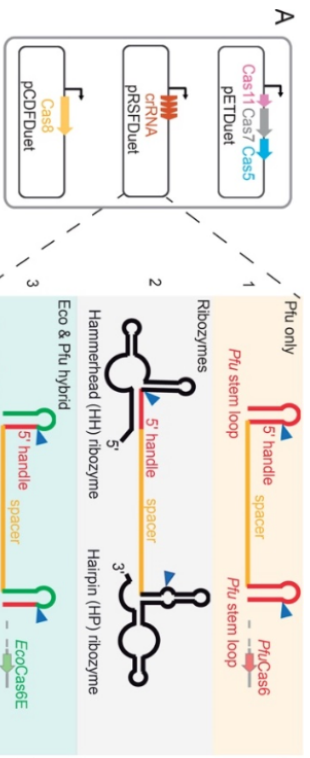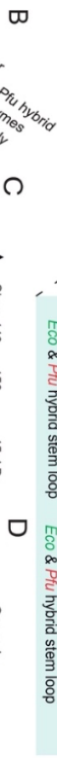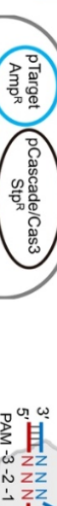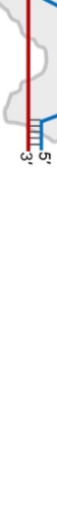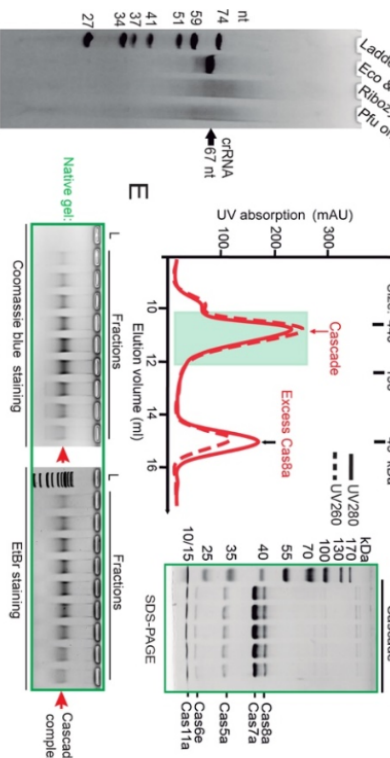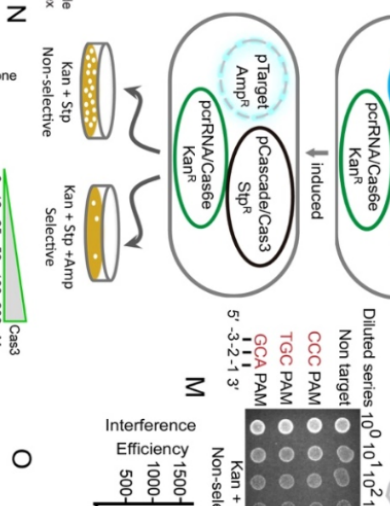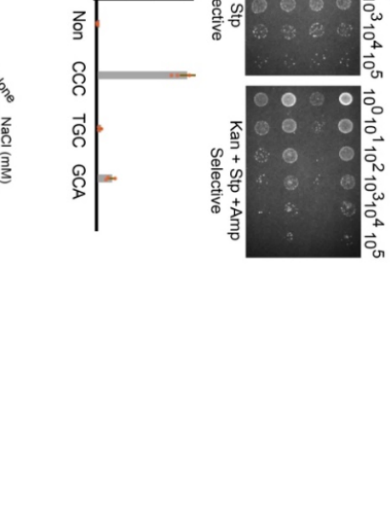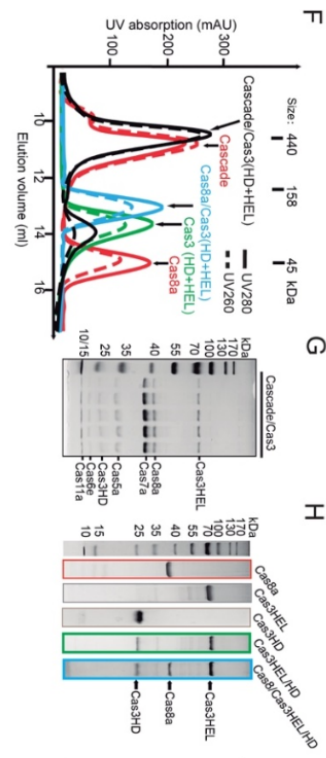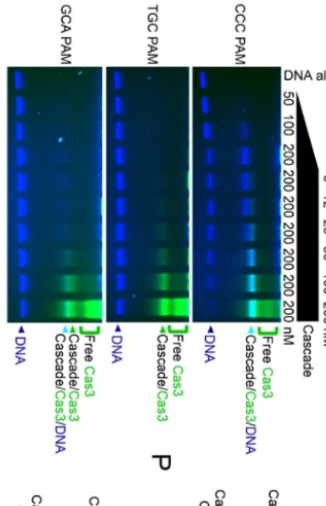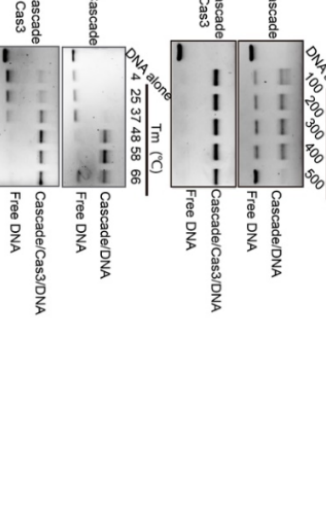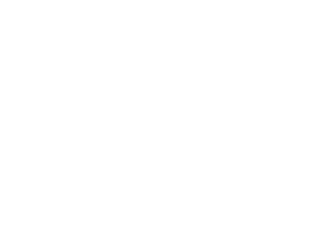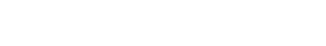

**Figure S1. Reconstitution and biochemical characterization of I-A *Pfu* Cascade-Cas3 effector complex, related to Figure 1.**

**(A)** Co-expression scheme and schematic explanation of three strategies to promote efficient pre-crRNA procession in complex reconstitution. **(B)** RNA quality evaluated by denaturing-PAGE in each of the three strategies described in A. **(C)** Elution profile of the successfully purified *Pfu* Cascade on size-exclusion chromatography (SEC). **(D)** SDS-PAGE analysis of the SEC peak fractions. **(E)** Native-PAGE analysis of the SEC peak fractions stained with Coomassie blue and EtBr for protein and nucleic acid components. **(F)** Comparison of the SEC profiles of the reconstituted *Pfu* Cascade-Cas3, Cascade, Cas8a-Cas3, Cas3, and Cas8a complexes and components. **(G)** Representative SDS-PAGE analysis of the SEC peak fractions containing the *Pfu* Cascade-Cas3 complex. **(H)** SDS-PAGE analysis of the purified Cas8a, Cas3 (HD+HEL), Cas3 HEL, Cas HD, and Cas8a-Cas3 (HD+HEL). **(I)** Comparison of the SEC profiles of *Pfu*- and *Tfu*- Cascade+Cas3, Cascade, and Cas3. *Pfu*-Cascade complexes with Cas3 in the absence of the target DNA, whereas *Tfu*-Cascade fails to do so. **(J)** Native-agarose EMSA showing *Pfu*Cascade-Cas3 has much tighter affinity for the target DNA than *Pfu* Cascade alone. **(K)** Schematic diagram explaining the *in vivo* interference setup. **(L)** Evaluation of the PAM code used by *Pfu* Cascade-Cas3 using dilution-spotting assay. **(M)** Quantification of the interference efficiency mediated by three different PAMs using the assay format depicted scheme in K. **(N)** Native-agarose EMSA confirming that CCC PAM promotes tight binding by *Pfu* Cascade-Cas3, presumably through R-loop formation. FAM-labeled dsDNA is rendered in blue color, Cy3-labeled Cas3 in green, Cascade not colored. **(O), (P)** Native-agarose EMSA revealing that *Pfu* Cascade-Cas3/DNA interaction remains stable in the presence of 0.5 M NaCl **(O)** or at 66 °C **(P)**, respectively. *Pfu* Cascade/DNA interaction is less stable at each category.

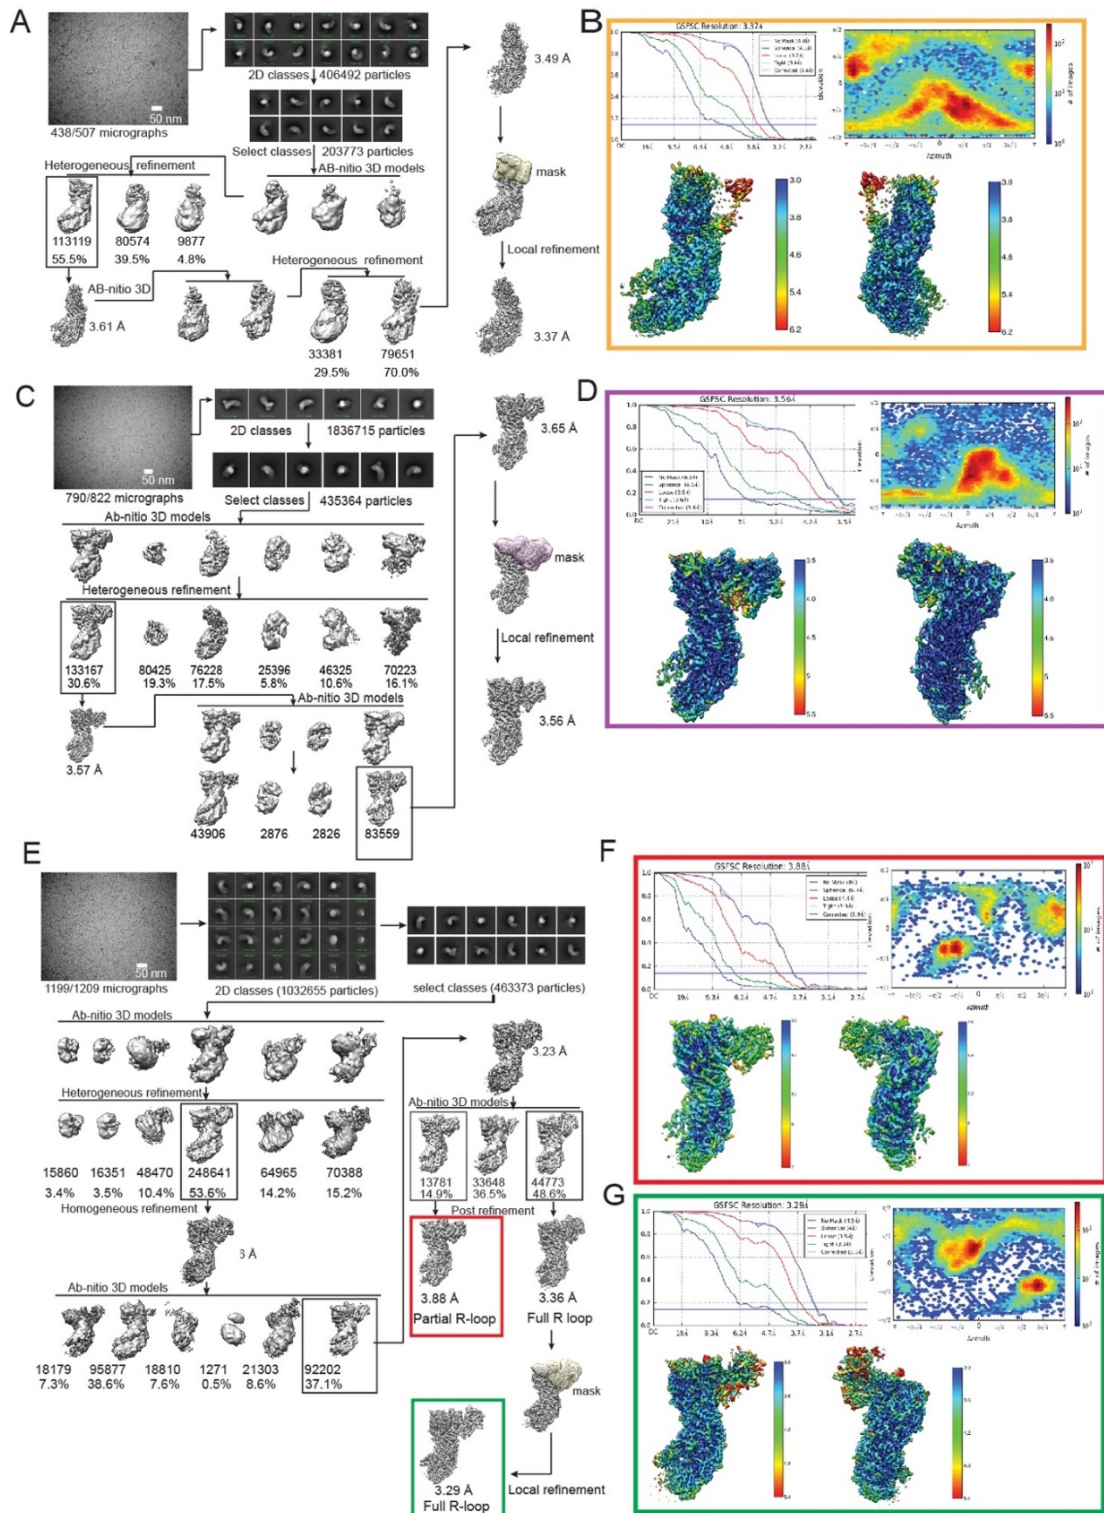

**Figure S2. Flow-chart of the cryo-EM single particle reconstructions of *Pfu* Cascade-Cas3 in four different functional states, related to Figure 2.**

**(A), (B)** Workflow of the cryo-EM image processing and 3D reconstruction for the *apo Pfu* Cascade complex. **(C), (D)** Workflow of the cryo-EM image processing and 3D reconstruction for the *Pfu* Cascade-Cas3 complex. **(E), (F), (G)** Workflow of the cryo-EM image processing of the *Pfu* Cascade-Cas3/dsDNA complex, which produced two high-resolution 3D reconstructions, *Pfu* Cascade-Cas3/partial R-loop **(F)** and *Pfu*

Cascade-Cas3/full R-loop (G).

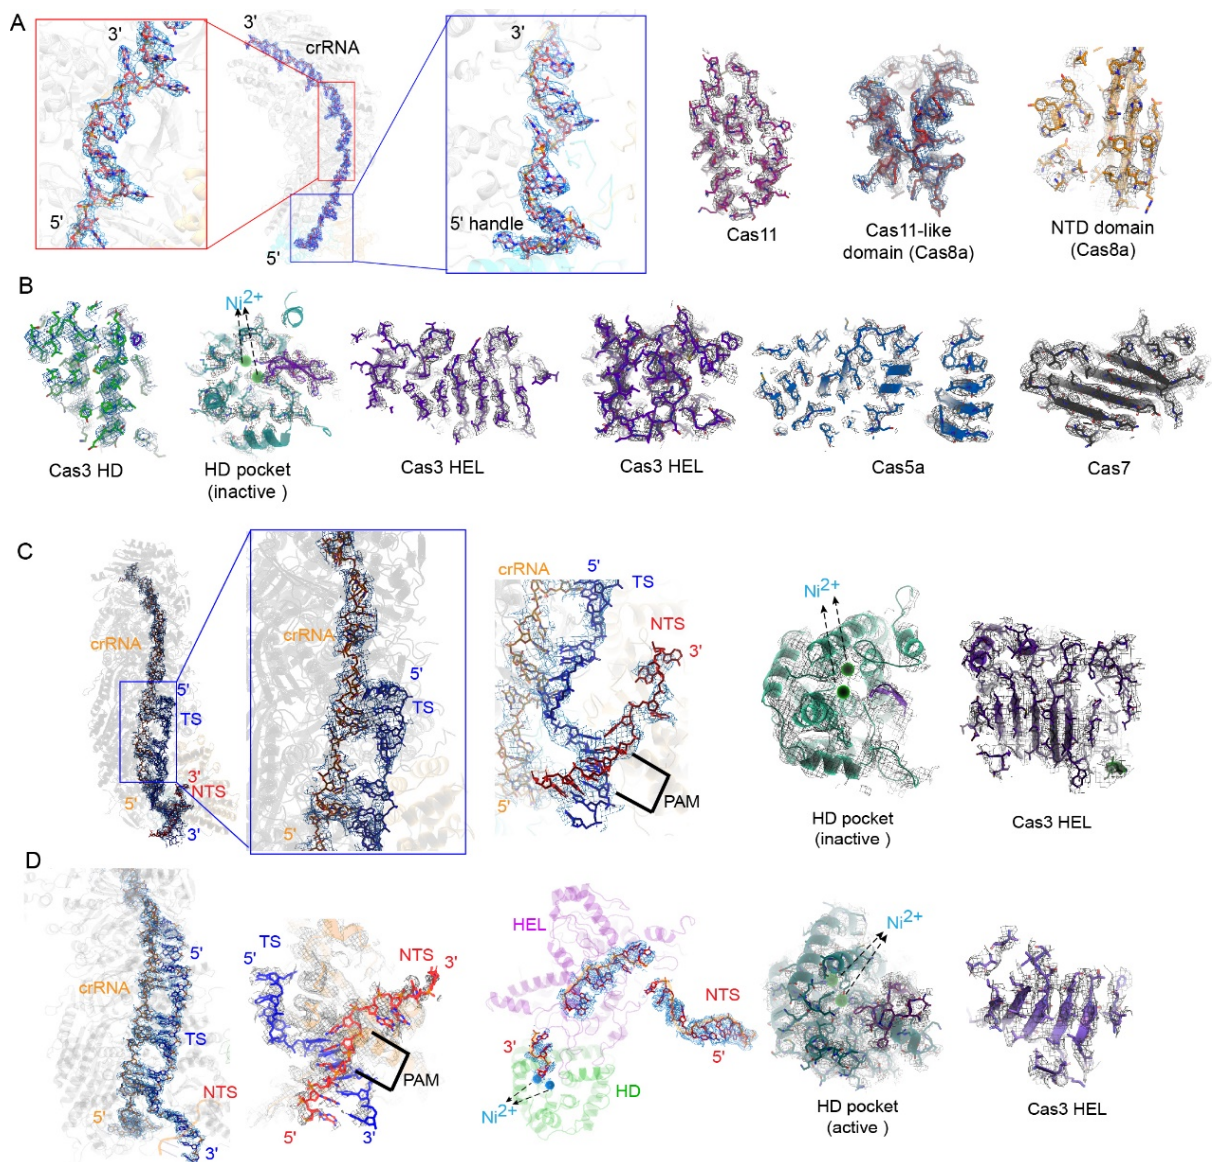

**Figure S3. Flow-chart of the cryo-EM single particle reconstructions of *Pfu* Cascade-Cas3 in four different functional states, related to Figure 2.**

**(A), (B)** Workflow of the cryo-EM image processing and 3D reconstruction for the *apo Pfu* Cascade complex. **(C), (D)** Workflow of the cryo-EM image processing and 3D reconstruction for the *Pfu* Cascade-Cas3 complex. **(E), (F), (G)** Workflow of the cryo-EM image processing of the *Pfu* Cascade-Cas3/dsDNA complex, which produced two high-resolution 3D reconstructions, *Pfu* Cascade-Cas3/partial R-loop **(F)** and *Pfu* Cascade-Cas3/full R-loop **(G)**.

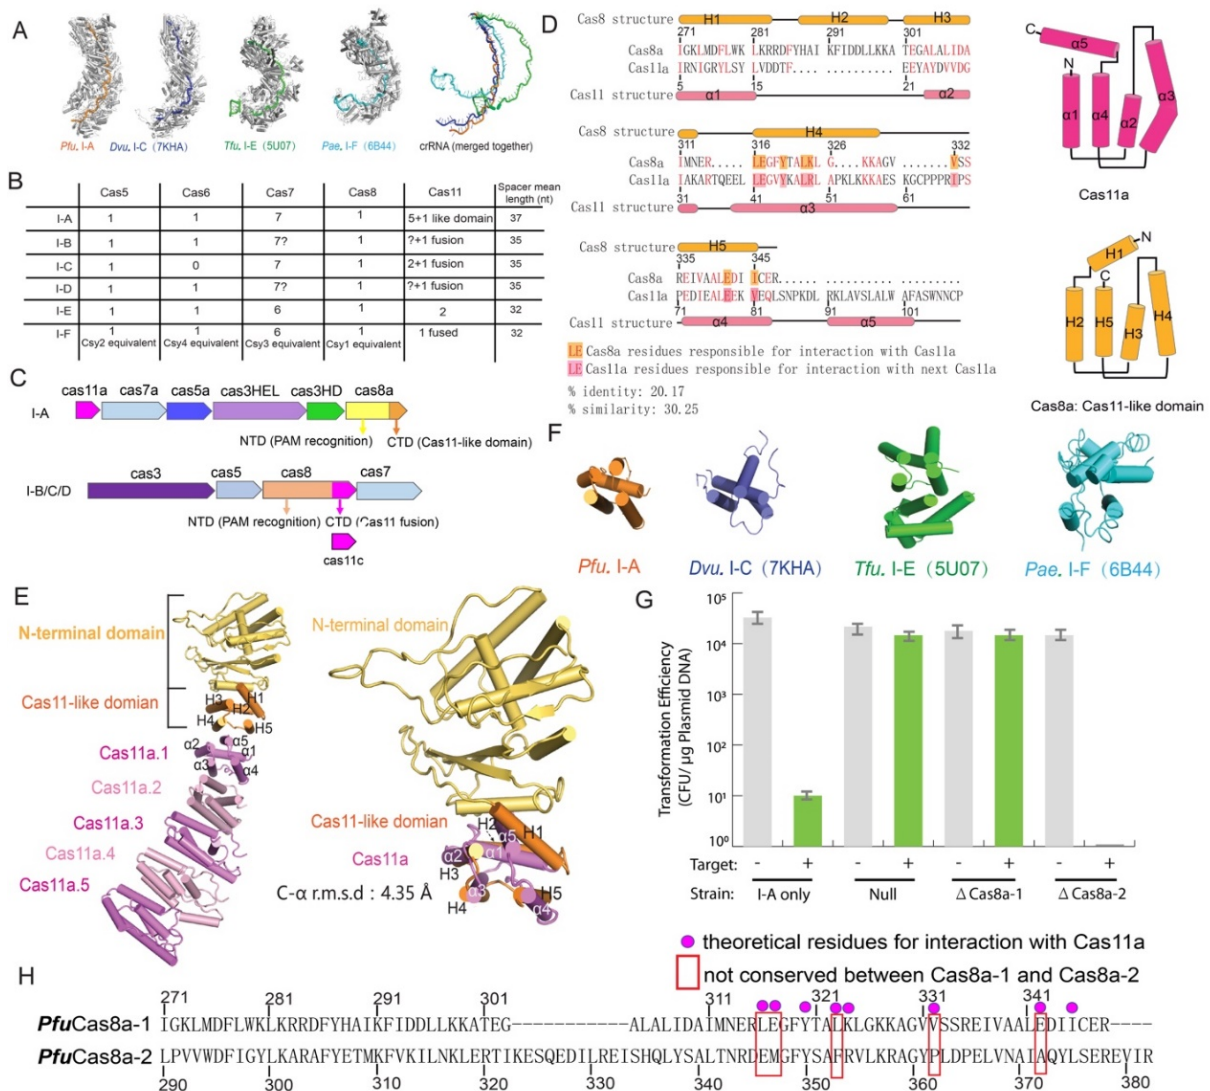

**Figure S4. Structure-function analysis of *Pfu* Cascade and *Pfu* Cascade-Cas3, related to Figures 3.**

**(A)** Comparison of the overall shape and backbone curvature among representative I-A, I-C, I-E, and I-F Cascades. PDB accession codes are denoted. I-A *Pfu* Cascade resembles I-C *Dvu* Cascade in overall shape and curvature. **(B)** Tabulating the differences in the subunit stoichiometry and crRNA length among subtypes of Cascades. **(C)** I-A and I-C *cas* operon differences. I-C *cas11* is encoded by a hidden ORF inside *cas8c*. I-A *cas11* is separately encoded and *cas8a* further encodes a Cas11-like domain. **(D)** Left: Sequence and structure similarity between Cas8a CTD (the Cas11-like domain) and Cas11. Interface residues mediating the Cas11-Cas11 interaction are highly conserved in the Cas11-like domain. Right: comparison of the 2D topographic structure between Cas11-like domain of Cas8a and Cas11. **(E)** Arrangement of the *Pfu* Cascade “inner belly”, assembled from Cas8a and multiple copies of Cas11. Cas11 and Cas11-like domain in Cas8a are structural homologs, with a C $\alpha$  r.m.s.d. of 4.35 Å. **(F)** I-A *Pfu* Cas11 is structurally homologous to the I-C Cas11c (PDB: 7KHA), I-E Cas11e (PDB: 5U07), and I-F Cas11 (Csy1 fused) (PDB: 6B44) **(G)** Cas8a variants knock out interference assay. *P. furiosus* strains with only the I-A effector module (I-A only), deletion of all effector modules (Null), or with only the I-A module and deletion of

either Cas8a-1 or Cas8a-2 ( $\Delta$ Cas8a-1 or  $\Delta$ Cas8a-2 respectively) were challenged with either a plasmid containing a miniature CRISPR array consisting of three spacers targeting three essential genes on the *P. furiosus* chromosome (Target: +) or the same plasmid lacking these spacers (Target: -). **(H)** Partial sequence alignment between Cas8a-1, which assembles into *Pfu* Cascade and used in this structural study, and its paralog in *Pfu* I-A cas operon Cas8a-2. Interface residues to Cas11 in Cas8a-1 are not conserved in Cas8a-2, which explains why Cas8a-2 does not assemble into *Pfu* Cascade and not functional for interference.

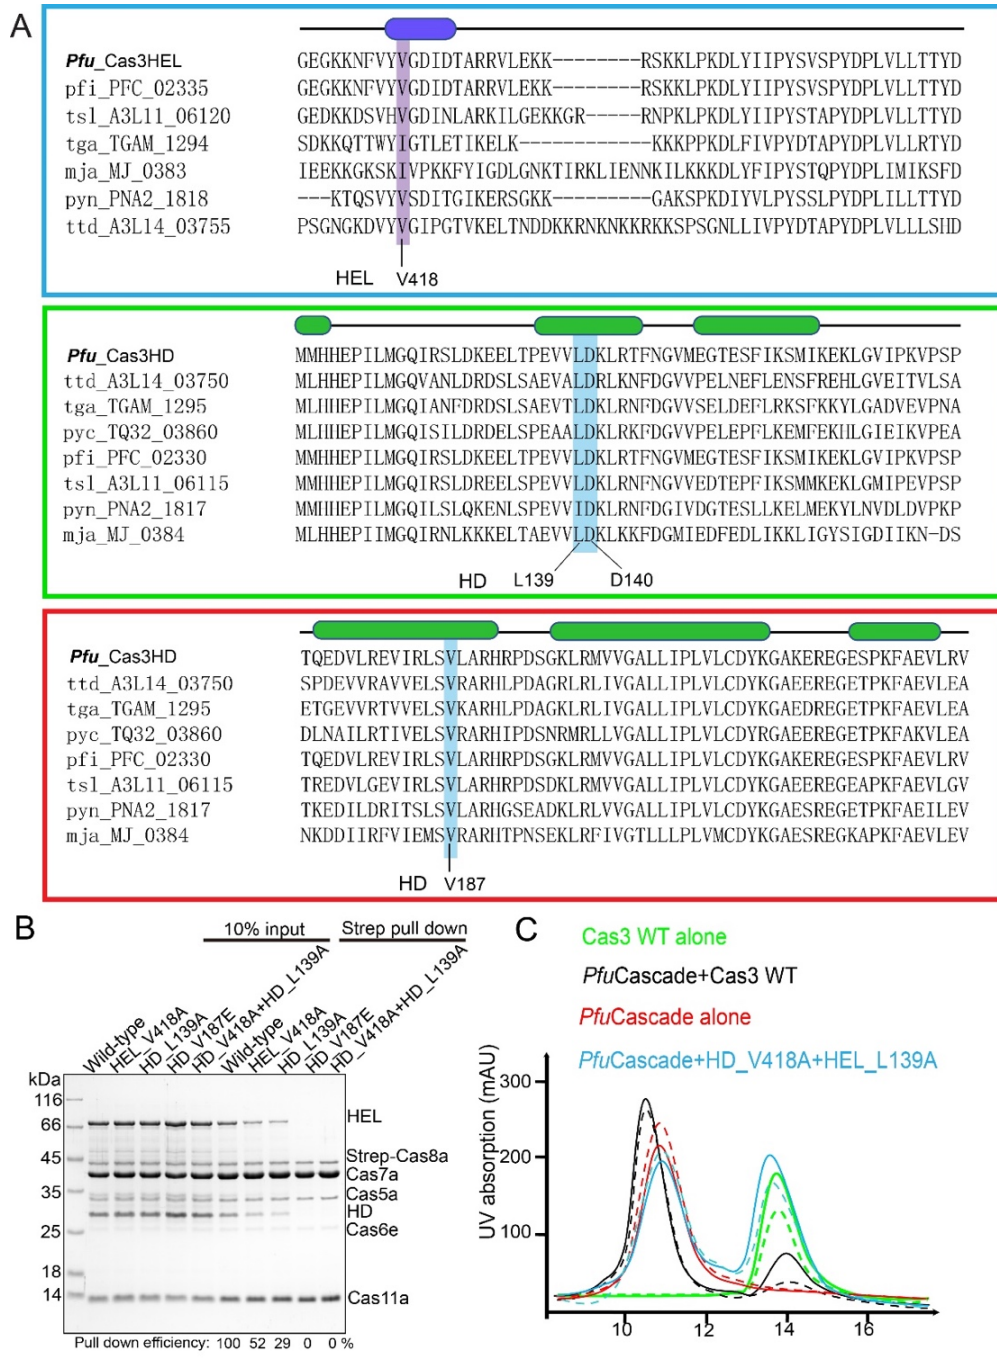

**Figure S5, Structure-function analysis of *Pfu* Cascade and *Pfu* Cascade-Cas3, related to Figures 3.**

**(A)** Sequence alignment of the Cascade-Cas3 interface residues among representative I-A homologs. Highly conserved interface residues were identified for mutagenesis validation.

**(B)** Strep-tagged Cas8a pull-down assay results analyzed by SDS-PAGE. Left five lanes are input controls containing Strep-tagged wildtype and interface mutant *Pfu* Cascade samples, mixed with equimolar amount of Cas3 (HD+HEL). Right five lanes are the samples after Strep-tag pull-down. Note that the HD and HEL subunits of Cas3 are significantly less or completely absent from the mutant lanes.

**(C)** SEC profile showing that *Pfu* Cas3 bearing V418A and L139A mutations no longer complexes with *Pfu* Cascade.



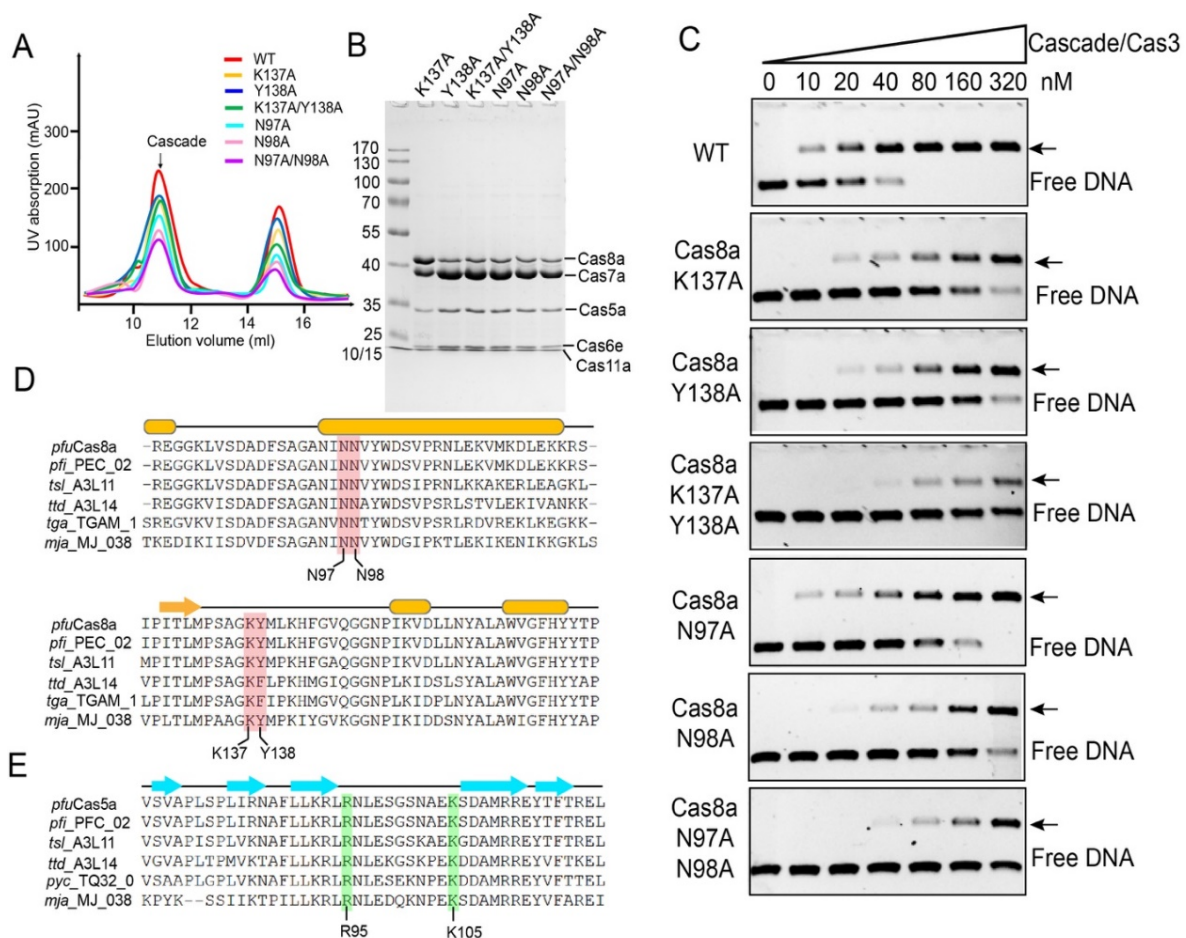

**Figure S6. Structure-function validation of the PAM recognition mechanism by *Pfu* Cascade-Cas3, related to Figure 4.**

**(A)** SEC profiles of various *Pfu* Cascade samples bearing PAM-recognition residue mutations. **(B)** SDS-PAGE analysis of the integrity of the PAM recognition mutants purified in (A). **(C)** Native-agarose EMSA quantifying the extent of DNA-binding reduction caused by each PAM-recognition mutation. **(D)** Sequence alignment showing that the PAM-recognition residues are highly conserved among I-A Cas8a homologs. **(E)** Same sequence alignment among Cas5a homologs. Again, PAM-recognition residues are highly conserved.

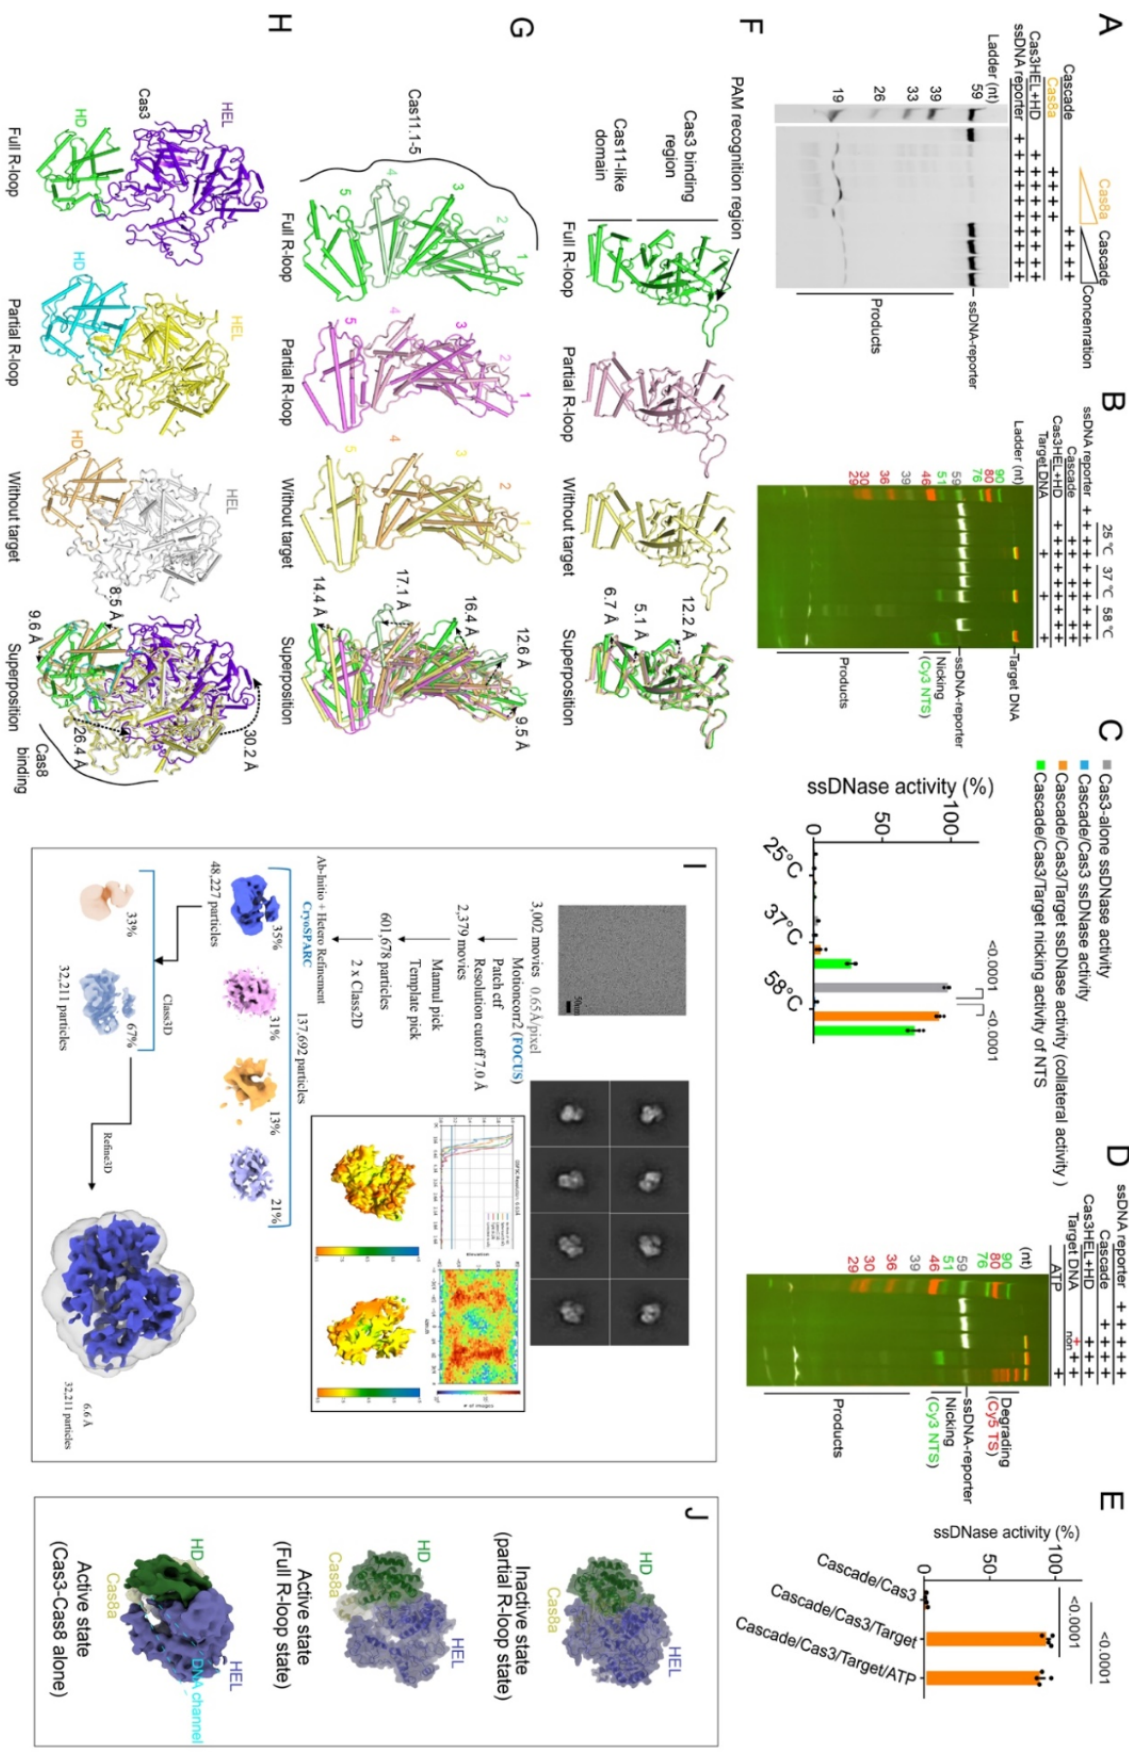

Figure S7. Thorough analysis of the RNA-guided and R-loop-dependent allosteric

**activation mechanism inside *Pfu* Cascade-Cas3, related to Figure 5.**

**(A)** Denaturing urea-PAGE showing that the HD-nuclease activity of *Pfu* Cas3 was robust by itself or in complex with Cas8a. It became undetectable upon complex formation with *Pfu* Cascade. The assay was performed using a 5'-FAM labeled ssDNA. **(B)** Temperature-dependent nuclease assay analyzed on urea-PAGE revealed that the autoinhibition was robust in various temperatures. At higher temperatures and in the presence of a cognate DNA target, both the target and the ssDNA reporter were robustly degraded by *Pfu* Cascade-Cas3. Coloring scheme is the same as in Figure 3C. **(C)** Quantification of the banding intensities in B. to reveal the nuclease activities changes in various conditions. **(D), (E)** Further urea-PAGE and band quantification analyses to compare the nuclease activity changes against cognate dsDNA substrate and the ssDNA reporter in the presence or absence of ATP. **(F)** Superposition of Cas8a before and after full R-loop formation revealing the hinge motion between Cas8a NTD and its C-terminal Cas11-like domain. **(G)** Superposition of Cas11.1-5 in different functional states revealing the twisting motion before and after full R-loop formation. **(H)** Superposition of Cas3 in different functional states revealing the global and local motions before and after full R-loop formation. **(I)** Workflow of the cryo-EM image processing and 3D reconstruction for the *Pfu* Cas3-Cas8a sub-complex. **(J)** The resulting 6.6 Å *Pfu* Cas3-Cas8a sub-complex reconstruction reveals that the HD-nuclease center adopts an open conformation, similar to the active state in the full R-loop *Pfu* Cascade-Cas3 structure. This is consistent with *Pfu* Cas3-Cas8a possessing highly active nuclease activity.

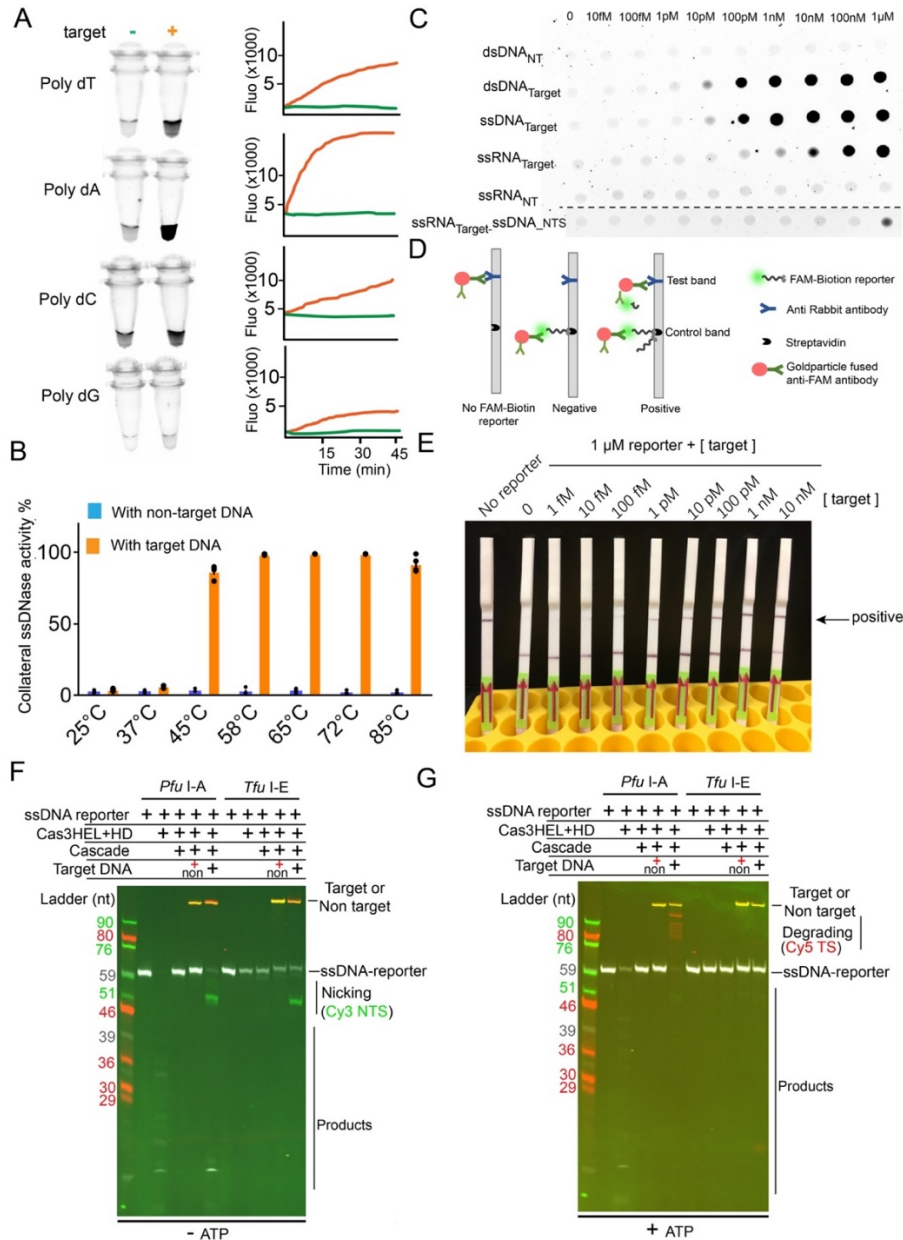

**Figure S8. Additional data supporting the development of a nucleic acid detection platform from I-A *Pfu* Cascade-Cas3, related to Figure 6. (A)** Nucleic acid detection assay with different poly-deoxynucleotide ssDNA-FQ reporters. Left: fluorescence changes in the test tube. Right: quantification of the fluorescence changes over time. **(B)** Temperature-dependency of the collateral damage activity by *Pfu* Cascade-Cas3 upon encountering a cognate DNA target. The system was highly active at 45 - 85°C. **(C)** Piloting experiment to evaluate the detection limit against various nucleic acid targets. NT, Non-target; NTS, Non-target strand. **(D)** Schematic diagram explaining the binary reporting setup in the lateral flow strip assay. **(E)** The lateral strip assay reliably detected dsDNA at 100 fM concentration. **(F, G)** Nuclease activity changes inside I-A *Pfu* Cascade-Cas3 and I-E *Tfu* Cascade-Cas3, without or with ATP present, respectively. In the absence of ATP, *Tfu* Cascade-Cas3 suffered high background and small dynamic range issues. In the absence of ATP, *Tfu* Cascade-Cas3 suffered low sensitivity issue. Coloring scheme is the same as in Figure 3C.

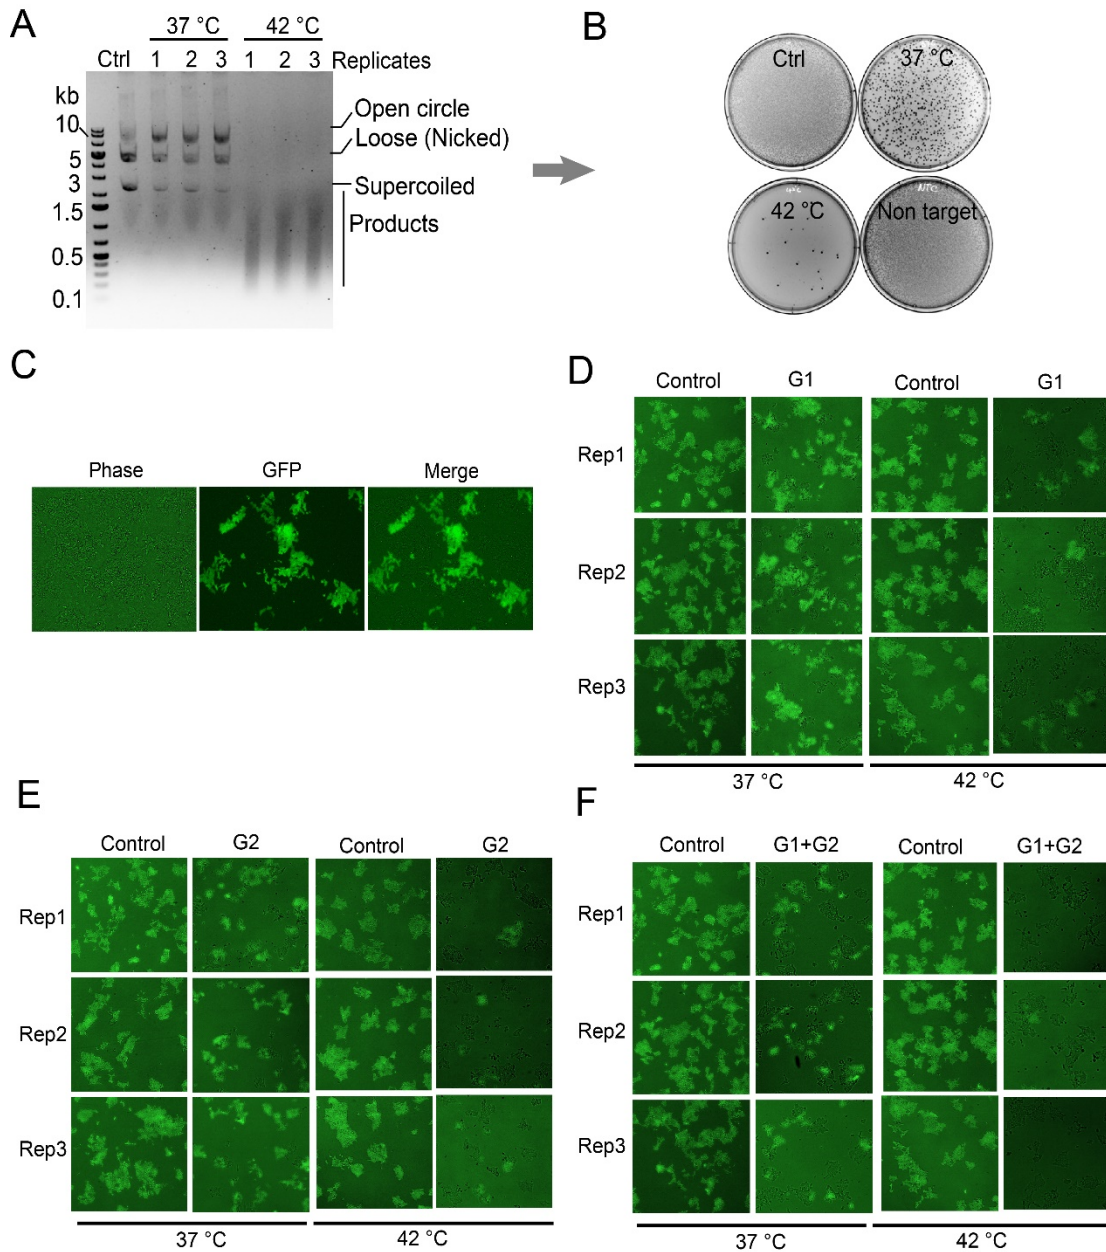

**Figure S9, *In vitro* and *in vivo* data supporting the bi-directional deletion activity in *Pfu* Cascade-Cas3, related to Figure 7.**

**(A)** The cleavage activity increases dramatically from 37°C to 42°C. **(B)** Transformation after cleavage assay in **(B)** and phenol extraction. **(C)** The representative images to show phase and GFP channel of cell culture. **(D, E)** Representative views of Guide 1 **(D)**, Guide 2 **(E)** mediated GFP knock-out experiment in HAP1-GFP cells, in triplicates. **(F)** Representative views of Guide 2 mediated GFP knock-out experiment in HAP1-GFP cells, in triplicates. **(F)** Representative views of Guide 1 and Guide 2 combined GFP knock-out experiment in HAP1-GFP cells, in triplicates.

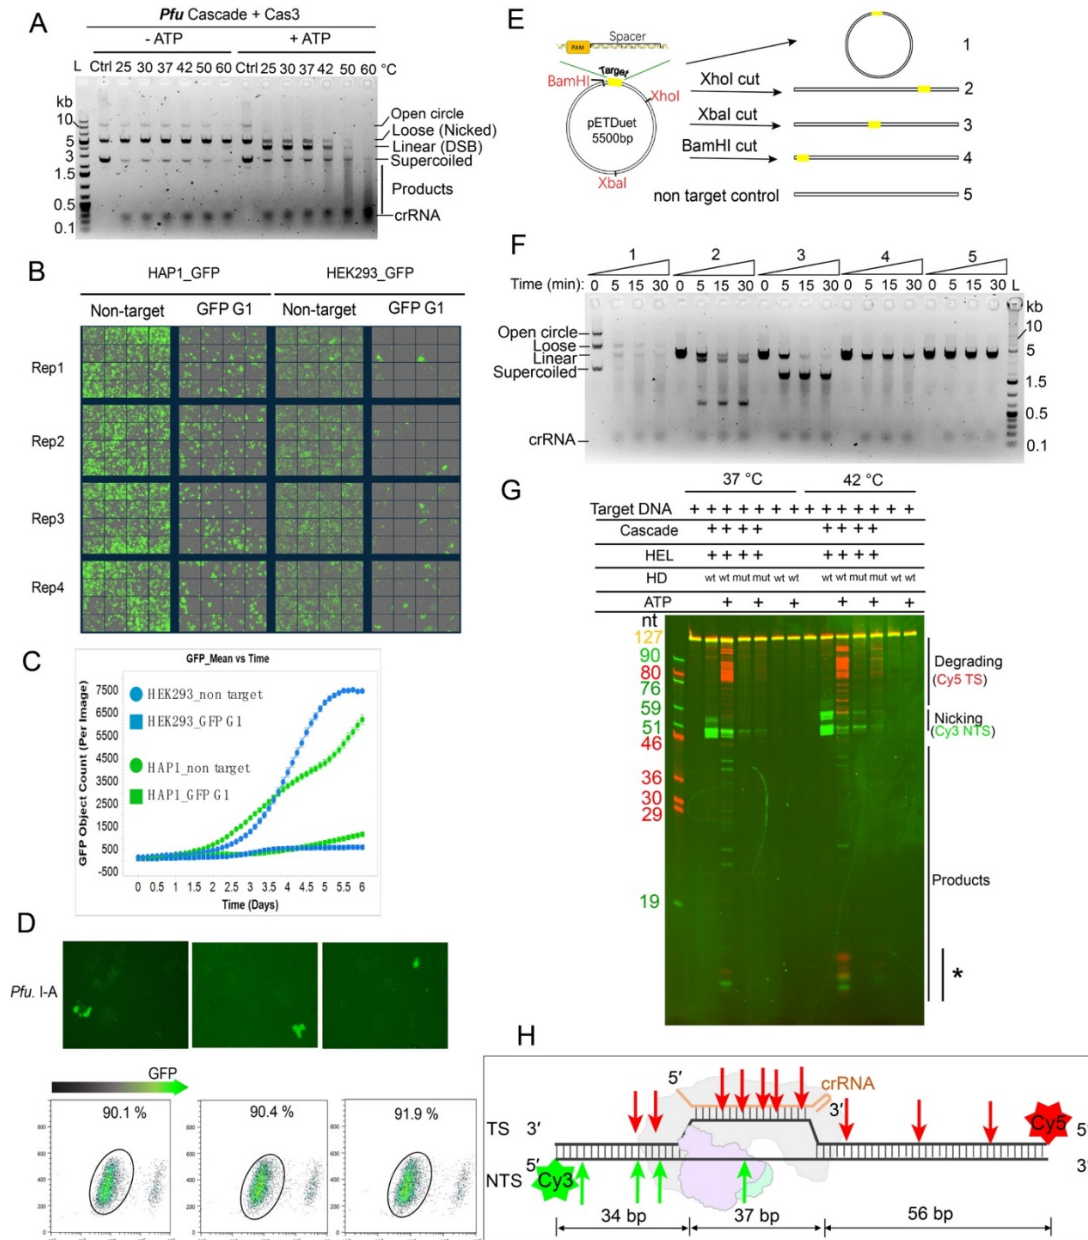

**Figure S10. Additional data supporting the bi-directional deletion activity in *Pfu* Cascade-Cas3, *in vitro* and *in vivo*, related to Figure 7.**

**(A)** RNA-guided plasmid cleavage by *Pfu* Cascade-Cas3, at different temperatures and +/- ATP. *Pfu* Cascade-Cas3 mainly nicks plasmids in the absence of ATP, but switches to a processive degradation behavior in the presence of ATP. **(B)** Comparison of GFP knock-out experiments in HAP1-GFP and HEK291-GFP cells, in quadruplicates. **(C)** Real-time GFP signal monitoring after delivery of *Pfu* I-A Cascade-Cas3 in HEK293 and Hap1 cell lines. **(D)** Different concentration combination of Cascade:Cas3 for I-A system. **(E)** Schematics of the substrates used in the DNA degrading assay. The circular plasmid was linearized by different restriction enzymes to place PAM into different locations. **(F)** Deletion polarity was defined by observing the relative stability of the two cleavage product bands. *Pfu* I-A Cascade-Cas3 was found here to degrade both the PAM-proximal and -distal dsDNA. **(G)** Mapping of the *Pfu* I-A Cascade-Cas3 cleavage sites on TS and NTS, using a dual-labeled DNA substrate, at 37 or 42°C, +/- ATP, +/- HD active site mutation. **(H)** Illustration of the cleavage pattern in

(G).

**Supplementary Table 1. Cryo-EM data collection, refinement and validation statistics.  
(Related to Figure 2)**

| Data collection                          | Cascade alone    | Cascade-Cas3      | Partial R-loop    | Full R-loop       | Cas3-Cas8a alone |
|------------------------------------------|------------------|-------------------|-------------------|-------------------|------------------|
| PDB code                                 | 7TR6             | 7TR8              | 7TR9              | 7TRA              | --               |
| EMDB code                                | 26081            | 26082             | 26083             | 26084             | 26097            |
| Magnification(nominal)                   | 67k              | 67k               | 67k               | 67k               | 60k              |
| Voltage (Kv)                             | 200              | 200               | 200               | 200               | 300              |
| Electron exposure(e-/Å <sup>2</sup> )    | 50               | 50                | 50                | 50                | 60               |
| Defocus range(um)                        | 1.-2.5           | 1-2.5             | 1-2.5             | 1-2.5             | 0.8-2.5          |
| Raw Pixel size(Å)                        | 0.615            | 0.615             | 0.615             | 0.615             | 0.65             |
| symmetry                                 | C1               | C1                | C1                | C1                | C1               |
| Micrographs                              | 507              | 822               | 1,209             |                   | 3,002            |
| Initial particle images(No.)             | 203,773          | 435,364           | 463,373           |                   | 601,678          |
| Final particle images(No.)               | 79,651           | 83,559            | 13,781            | 44,773            | 32,211           |
| Map resolution(Å)                        | 3.4              | 3.6               | 3.9               | 3.3               | 6.6              |
| FSC threshold                            | 0.143            | 0.143             | 0.143             | 0.143             | 0.143            |
| Map resolution range (Å)                 | 20-3.0           | 20-3.4            | 20-3.6            | 20-3.0            | 20-6.0           |
| <b>Refinement</b>                        |                  |                   |                   |                   |                  |
| Initial model used                       | De novo          | De novo           | De novo           | De novo           | –                |
| Map sharpening B factor(Å <sup>2</sup> ) | -100             | -100              | -100              | -100              | –                |
| <b>Model composition</b>                 |                  |                   |                   |                   |                  |
| Nonhydrogen atoms                        | 27,450           | 33,583            | 34,173            | 34,874            | –                |
| Protein residues /Nucleotide             | 3,383/45         | 4,192/45          | 4,192/75          | 4,174/113         | –                |
| Ligands                                  | 0                | 2                 | 2                 | 2                 | –                |
| Water                                    | 0                | 0                 | 0                 | 0                 | –                |
| <b>B factors (Å<sup>2</sup>)</b>         |                  |                   |                   |                   |                  |
| protein                                  | 50.7/500.3/147.2 | 66.8/214.3/112.0  | 116.5/475.4/215.0 | 55.9/316.4/113.8  | –                |
| Nucleotide                               | 69.5/244.7/114.6 | 82.6/146.5/97.0   | 152.7/343.2/232.6 | 64.3/301.4/112.9  | –                |
| Ligand                                   | –                | 160.1/160.2/160.2 | 138.8/376.8/292.7 | 176.4/178.8/177.6 | –                |
| Water                                    | –                | –                 | –                 | –                 | –                |
| <b>R.m.s.d deviations</b>                |                  |                   |                   |                   |                  |
| Bond lengths (Å)                         | 0.003(0)         | 0.002(0)          | 0.003(0)          | 0.003(0)          | –                |
| bond angles(°)                           | 0.574(4)         | 0.549(9)          | 0.643(10)         | 0.607(7)          | –                |
| <b>Validation</b>                        |                  |                   |                   |                   |                  |
| MolProbity score                         | 2.07             | 2.06              | 2.20              | 2.19              | –                |
| Clashscore                               | 13.36            | 11.68             | 15.77             | 15.97             | –                |
| Poor rotamers(%)                         | 0.00             | 0.00              | 0.00              | 0.00              | –                |
| <b>Ramachandran plot</b>                 |                  |                   |                   |                   |                  |
| Favored(%)                               | 93.33            | 92.13             | 91.60             | 92.10             | –                |

|               |      |      |      |      |   |
|---------------|------|------|------|------|---|
| Allowed(%)    | 6.64 | 7.48 | 8.11 | 7.66 | - |
| Disallowed(%) | 0.03 | 0.39 | 0.29 | 0.24 | - |



**Supplementary Table 2. Plasmids used in this work. (Related to Figure 1 and Figure 7)**

| Name in this study                  | Insert           | Derived from vector | Marker       | purpose        |
|-------------------------------------|------------------|---------------------|--------------|----------------|
| pCDFuet-Cascade/Cas3                | Native operon    | pETDeut             | streptomycin | Interference   |
| pCRISPR-1-ribozymes                 | CRISPR array     | pRSFDuet            | Kanamycin    | purification   |
| pCRISPR-1-PfuCas6a                  | CRISPR array     | pRSFDuet            | Kanamycin    | purification   |
| pCRISPR-1-EcoCas6e                  | CRISPR array     | pRSFDuet            | Kanamycin    | purification   |
| pETDuet-Target DNA                  | Target DNA       | pRSFDuet            | Ampicillin   | Interference   |
| pCRISPR-GFP_G1-EcoCas6e             | CRISPR array     | pRSFDuet            | Kanamycin    | purification   |
| pCRISPR-GFP_G2-EcoCas6e             | CRISPR array     | pRSFDuet            | Kanamycin    | purification   |
| pRSFDuet-G1 target DNA              | Target DNA       | pRSFDuet            | Kanamycin    | Cleavage assay |
| pETDuet-Cas11-Cas7-Cas5-His tag     | Cas11-Cas7-Cas5  | pETDuet             | Ampicillin   | purification   |
| pCDFDuet-Strep tag-Cas8             | Cas8             | pCDFDuet            | streptomycin | purification   |
| pRSFDuet-Cas3HD                     | Cas3HD           | pRSFDuet            | Kanamycin    | purification   |
| pRSFDuet-Cas3HEL                    | Cas3HEL          | pRSFDuet            | Kanamycin    | purification   |
| pRSFDuet-Cas3HEL-NLS tag            | Cas3HEL          | pRSFDuet            | Kanamycin    | purification   |
| pRSFDuet-Cas3HD-NLS tag             | Cas3HD           | pRSFDuet            | Kanamycin    | purification   |
| pCDFDuet-Strep tag-NLS tag-Cas8     | Cas8             | pCDFDuet            | streptomycin | purification   |
| pETDuet-Cas11-Cas7-NLS tag-Cas5-His | Cas11-Cas7-Cas5  | pETDuet             | Ampicillin   | purification   |
| pET19-Strep tag-NLS tag-TfuCasA-NLS | CasA             | Mol cell, 2018      | Ampicillin   | purification   |
| pCDFDuet-TfuCasB-CasC-NLS-CasD-CasE | CasB-E           | Mol cell, 2018      | streptomycin | purification   |
| pET19-TfuCas3-NLS-Strep tag         | Cas3             | Mol cell, 2018      | Ampicillin   | purification   |
| pJET-I-A G1 deletion library        | deletion library | pJET                | Kanamycin    | Sequencing     |
| pETDuet-Cas11-Cas7-Cas5-His tag     | Cas11-Cas7-Cas5  | pETDuet             | Ampicillin   | purification   |
| pCDFDuet-Target DNA                 | Target DNA       | pRSFDuet            | streptomycin | Interference   |

**Supplementary Table 3. Primers and protein sequence used in this work. (Related to Figure 1 and Figure 7)**

| Name           | Sequence (5' – 3')                                                                                                                                                                                                                 | Description                                                                                                                                   |
|----------------|------------------------------------------------------------------------------------------------------------------------------------------------------------------------------------------------------------------------------------|-----------------------------------------------------------------------------------------------------------------------------------------------|
| CY032<br>CY033 | ATATGGATCCATGGGGGATGGATCAGAAATATTG,<br>ATATCTCGAGTCAGCTCTCTGAAGAGTTTTTCGG                                                                                                                                                          | <i>Pfu</i> Cas11a-Cas7a-Cas5a<br>PCR amplification                                                                                            |
| CY034<br>CY035 | ATATGGATCC ATGAAATTTAACGAATTTAAACACCT,<br>ATATCTCGAGTTAACGTTACATATTATATCCTCC                                                                                                                                                       | <i>Pfu</i> Cas8a PCR amplification                                                                                                            |
| CY030<br>CY031 | ATATGGATCCATGAGGTTTTTAATAAGACTAGTTCC,<br>ATATCTCGAGTTATACTCCAGTTTTTAATTCCTCTC                                                                                                                                                      | <i>Pfu</i> Cas6a PCR amplification                                                                                                            |
| CY077<br>CY078 | GATTCAGGATCCATGTATCTCAGTAAAGTCATCATTG,<br>GTAGTTCTCGAGTCACAGTGGAGCCAAAGATAGC                                                                                                                                                       | <i>Eco</i> Cas6e PCR<br>amplification                                                                                                         |
| CY042          | GTTCCAATAAGACTACAAAAGAATTGAAAGAGTGCTTCCCCAAAC<br>CCTTAACTGGTTGTAACAGTTGGTTCCAATAAGACTACAAAAG<br>(pcrRNA)                                                                                                                           | <i>Pfu</i> repeat-spacer-repeat,<br>For <i>pfu</i> Cas6a processing                                                                           |
| CY043          | CAACTTTCAATTGATGAGTCCGTGAGGACGAAACGGTACCCGGT<br>ACCGTCATTGAAAGTTGAGTGCTTCCCCAAACCCTTAACTGGTTG<br>TAACAGTTGAGAGTTCCCGCGCCAGCGGGGATAAACCGTGGC<br>AGTCCTGTTGAAAACAGAGAAGCCAACCAGAGAAACACACGTT<br>GTGGTATATTACCTGGTACCTATGTA, (pcrRNA) | HH ribozyme- <i>Pfu</i> 5' handle-<br>spacer-HP ribozyme                                                                                      |
| CY072          | GAGTTCGCCGCGCCAGCGGGATTGAAAGAGTGCTTCCCCAAA<br>CCCTTAACTGGTTGTAACAGTTGAGTTCGCCGCGCCAGCGGG<br>, (pcrRNA)                                                                                                                             | <i>Eco</i> repeat (recognition and<br>cleavage part) – <i>Pfu</i> 5'<br>handle- spacer- <i>Eco</i> repeat,<br>For <i>Eco</i> Cas6e processing |
| CY056<br>CY057 | GCCGTACCTCTGAA TCACGAAGGGGTTGGGAATTGACCAACAT<br>TGTC AACGGGAGTTACTCGCG (TS),<br>CGCGAGTAACT CCCAGTGCTTCCCCAAACCCTTAACTGGTTGTAA<br>CAGTTG TTCAGAGGTACGGC (NTS)                                                                      | Target DNA, CCC PAM -<br>spacer                                                                                                               |
| CY216<br>CY217 | GCCGTACCTCTGAA TCACGAAGGGGTTGGGAATTGACCAACAT<br>TGTC AACGCAAGTTACTCGCG (TS),<br>CGCGAGTAACT TGCAGTGCTTCCCCAAACCCTTAACTGGTTGTAA<br>CAGTTG TTCAGAGGTACGGC (NTS)                                                                      | Target DNA, TGC PAM -<br>spacer                                                                                                               |
| CY218<br>CY219 | GCCGTACCTCTGAA TCACGAAGGGGTTGGGAATTGACCAACAT<br>TGTC AACTGCAGTTACTCGCG (TS),<br>CGCGAGTAACT GCAAGTGCTTCCCCAAACCCTTAACTGGTTGTAA<br>CAGTTG TTCAGAGGTACGGC (NTS)                                                                      | Target DNA, GCA PAM -<br>spacer                                                                                                               |
| CY179<br>CY037 | ATATAT GGATCC AGTTGTAAGGCATTCCAAGGA,<br>GATATGTCGACTCACTTCATCATTTCAACTCTAAGA                                                                                                                                                       | <i>Pfu</i> Cas3 HD PCR<br>amplification                                                                                                       |
| CY180<br>CY036 | ATATAT GTCGAC TCATACTCTACCCCCAGT,<br>ATATGGATCCATGGATAACGAAAAACTCTTCAGAG                                                                                                                                                           | <i>Pfu</i> Cas3 HEL PCR<br>amplification                                                                                                      |
| CY057          | /56-FAM/-<br>CGCGAGTAACTCCCTTGTAGTATGCGGTCCTTGCGGCTGAGAGC<br>ACTTCAGAGGTACGGC                                                                                                                                                      | F-ssDNA reporter                                                                                                                              |

|                                           |                                                                                                                                                                                                                                                                                                                                                                                                                                                                                                                                                                                                                                                                                                                                                                                                                                                                                                                                                                                                                                                                                                                                                                                                                                                                                                                                                                                                                                                                                                                                                                                                                                                                                                                                                                                                                                                                                                                                                                                                                                                                                                                                                                                                                                                                                                                                                                                                                                                                                                                                                                                                                                                                                                                                                                                                                                                                                                                                                                                                                                              |                                                                 |
|-------------------------------------------|----------------------------------------------------------------------------------------------------------------------------------------------------------------------------------------------------------------------------------------------------------------------------------------------------------------------------------------------------------------------------------------------------------------------------------------------------------------------------------------------------------------------------------------------------------------------------------------------------------------------------------------------------------------------------------------------------------------------------------------------------------------------------------------------------------------------------------------------------------------------------------------------------------------------------------------------------------------------------------------------------------------------------------------------------------------------------------------------------------------------------------------------------------------------------------------------------------------------------------------------------------------------------------------------------------------------------------------------------------------------------------------------------------------------------------------------------------------------------------------------------------------------------------------------------------------------------------------------------------------------------------------------------------------------------------------------------------------------------------------------------------------------------------------------------------------------------------------------------------------------------------------------------------------------------------------------------------------------------------------------------------------------------------------------------------------------------------------------------------------------------------------------------------------------------------------------------------------------------------------------------------------------------------------------------------------------------------------------------------------------------------------------------------------------------------------------------------------------------------------------------------------------------------------------------------------------------------------------------------------------------------------------------------------------------------------------------------------------------------------------------------------------------------------------------------------------------------------------------------------------------------------------------------------------------------------------------------------------------------------------------------------------------------------------|-----------------------------------------------------------------|
| CY579<br>CY581                            | CCCAGAGCAGGGCCTTAGGGAAG,<br>GAAAGATGGCCGCTTCCCC                                                                                                                                                                                                                                                                                                                                                                                                                                                                                                                                                                                                                                                                                                                                                                                                                                                                                                                                                                                                                                                                                                                                                                                                                                                                                                                                                                                                                                                                                                                                                                                                                                                                                                                                                                                                                                                                                                                                                                                                                                                                                                                                                                                                                                                                                                                                                                                                                                                                                                                                                                                                                                                                                                                                                                                                                                                                                                                                                                                              | 1 kb Forward and reverse primers to map genome deletions.       |
|                                           | CAGACCCAGGAGTCCAGGC,<br>GCTGGGACCACCTTATATTTCCC                                                                                                                                                                                                                                                                                                                                                                                                                                                                                                                                                                                                                                                                                                                                                                                                                                                                                                                                                                                                                                                                                                                                                                                                                                                                                                                                                                                                                                                                                                                                                                                                                                                                                                                                                                                                                                                                                                                                                                                                                                                                                                                                                                                                                                                                                                                                                                                                                                                                                                                                                                                                                                                                                                                                                                                                                                                                                                                                                                                              | 2 kb Forward and reverse primer for mapping the genome editing. |
| CY584<br>CY585                            | AGGGATCCTGTGTGGCCATC,<br>TGCGATGTCCGGAGAGGATGG                                                                                                                                                                                                                                                                                                                                                                                                                                                                                                                                                                                                                                                                                                                                                                                                                                                                                                                                                                                                                                                                                                                                                                                                                                                                                                                                                                                                                                                                                                                                                                                                                                                                                                                                                                                                                                                                                                                                                                                                                                                                                                                                                                                                                                                                                                                                                                                                                                                                                                                                                                                                                                                                                                                                                                                                                                                                                                                                                                                               | 2 kb Forward and reverse primer for mapping the genome editing. |
| ssDNA_FQ                                  | /56-FAM/-AAAAAAAA/3BHQ1                                                                                                                                                                                                                                                                                                                                                                                                                                                                                                                                                                                                                                                                                                                                                                                                                                                                                                                                                                                                                                                                                                                                                                                                                                                                                                                                                                                                                                                                                                                                                                                                                                                                                                                                                                                                                                                                                                                                                                                                                                                                                                                                                                                                                                                                                                                                                                                                                                                                                                                                                                                                                                                                                                                                                                                                                                                                                                                                                                                                                      | ssDNA-FQ reporter                                               |
| ssDNA_F_Biotin                            | /56FAM/-AGGGAAACCTTTGGGCCCAATTCCGG/3Biotin/                                                                                                                                                                                                                                                                                                                                                                                                                                                                                                                                                                                                                                                                                                                                                                                                                                                                                                                                                                                                                                                                                                                                                                                                                                                                                                                                                                                                                                                                                                                                                                                                                                                                                                                                                                                                                                                                                                                                                                                                                                                                                                                                                                                                                                                                                                                                                                                                                                                                                                                                                                                                                                                                                                                                                                                                                                                                                                                                                                                                  | ssDNA-F-Biotin reporter                                         |
| Cas8a sequence                            | MGSSW <sup>S</sup> SH <sup>P</sup> Q <sup>F</sup> E <sup>K</sup> GG <sup>G</sup> SG <sup>G</sup> SG <sup>G</sup> SA <sup>W</sup> SH <sup>P</sup> Q <sup>F</sup> E <sup>K</sup> M <sup>S</sup> D <sup>S</sup> E <sup>V</sup> N <sup>Q</sup> E <sup>A</sup><br>K <sup>P</sup> E <sup>V</sup> K <sup>P</sup> E <sup>V</sup> H <sup>R</sup> E <sup>Q</sup> I <sup>G</sup> G <sup>S</sup> K <sup>F</sup> N <sup>E</sup> F <sup>K</sup> T <sup>P</sup> Q <sup>I</sup> D <sup>P</sup> I <sup>F</sup> D <sup>L</sup> Y <sup>V</sup> A <sup>Y</sup> G <sup>Y</sup> V <sup>E</sup> S <sup>L</sup> I <sup>R</sup> G <sup>G</sup> A <sup>K</sup><br>E <sup>A</sup> T <sup>L</sup> I <sup>P</sup> H <sup>G</sup> A <sup>S</sup> Y <sup>L</sup> I <sup>Q</sup> T <sup>D</sup> V <sup>S</sup> N <sup>E</sup> E <sup>F</sup> R <sup>H</sup> G <sup>L</sup> V <sup>D</sup> A <sup>L</sup> S <sup>E</sup> M <sup>L</sup> S <sup>L</sup> H <sup>I</sup> A <sup>L</sup> A <sup>R</sup> H <sup>S</sup> P <sup>R</sup> E<br>G <sup>G</sup> K <sup>L</sup> V <sup>S</sup> D <sup>A</sup> D <sup>F</sup> S <sup>A</sup> G <sup>A</sup> N <sup>I</sup> N <sup>N</sup> V <sup>Y</sup> W <sup>D</sup> S <sup>V</sup> P <sup>R</sup> N <sup>L</sup> E <sup>K</sup> V <sup>M</sup> K <sup>D</sup> L <sup>E</sup> K <sup>K</sup> R <sup>S</sup> V <sup>K</sup> G <sup>T</sup> A<br>T <sup>I</sup> P <sup>I</sup> L <sup>M</sup> P <sup>S</sup> A <sup>G</sup> K <sup>Y</sup> M <sup>L</sup> K <sup>H</sup> F <sup>G</sup> V <sup>Q</sup> G <sup>G</sup> N <sup>P</sup> I <sup>K</sup> V <sup>D</sup> L <sup>L</sup> N <sup>Y</sup> A <sup>L</sup> A <sup>W</sup> V <sup>G</sup> F <sup>H</sup> Y <sup>T</sup> P <sup>Y</sup> I<br>K <sup>Y</sup> A <sup>K</sup> G <sup>D</sup> T <sup>T</sup> W <sup>I</sup> H <sup>I</sup> Y <sup>Q</sup> I <sup>A</sup> P <sup>V</sup> E <sup>E</sup> V <sup>D</sup> M <sup>I</sup> S <sup>I</sup> L <sup>S</sup> L <sup>K</sup> D <sup>L</sup> K <sup>M</sup> H <sup>L</sup> P <sup>H</sup> Y <sup>E</sup> S <sup>N</sup> L <sup>D</sup> F <sup>L</sup> I <sup>N</sup><br>R <sup>R</sup> L <sup>A</sup> L <sup>L</sup> Y <sup>H</sup> L <sup>L</sup> H <sup>S</sup> E <sup>L</sup> G <sup>A</sup> L <sup>E</sup> L <sup>F</sup> T <sup>E</sup> K <sup>E</sup> F <sup>V</sup> I <sup>H</sup> S <sup>Y</sup> T <sup>L</sup> E <sup>R</sup> S <sup>G</sup> N <sup>N</sup> Q <sup>A</sup> I <sup>R</sup> S <sup>F</sup> E <sup>E</sup> E<br>E <sup>I</sup> G <sup>K</sup> L <sup>M</sup> D <sup>F</sup> L <sup>W</sup> K <sup>L</sup> R <sup>R</sup> D <sup>F</sup> Y <sup>H</sup> A <sup>I</sup> K <sup>F</sup> I <sup>D</sup> D <sup>L</sup> L <sup>K</sup> A <sup>T</sup> E <sup>G</sup> A <sup>L</sup> A <sup>L</sup> I <sup>D</sup> A <sup>I</sup> M <sup>N</sup> E <sup>R</sup> L <sup>E</sup><br>G <sup>F</sup> Y <sup>T</sup> A <sup>L</sup> K <sup>L</sup> G <sup>K</sup> K <sup>A</sup> G <sup>V</sup> V <sup>S</sup> S <sup>R</sup> E <sup>I</sup> V <sup>A</sup> A <sup>L</sup> E <sup>D</sup> I <sup>I</sup> C <sup>E</sup> R. | Twin-strep tag-linker-Cas8a                                     |
| Cas11a sequence                           | MGGWIRNIGRYSYLVD <sup>D</sup> T <sup>F</sup> E <sup>E</sup> Y <sup>A</sup> Y <sup>D</sup> V <sup>D</sup> G <sup>I</sup> A <sup>K</sup> A <sup>R</sup> T <sup>Q</sup> E <sup>E</sup> L <sup>L</sup> E <sup>G</sup> V <sup>Y</sup> K <sup>A</sup><br>L <sup>R</sup> L <sup>A</sup> P <sup>K</sup> L <sup>K</sup> K <sup>A</sup> E <sup>S</sup> K <sup>G</sup> C <sup>P</sup> P <sup>P</sup> R <sup>I</sup> P <sup>S</sup> P <sup>E</sup> D <sup>I</sup> E <sup>A</sup> E <sup>E</sup> K <sup>V</sup> E <sup>Q</sup> L <sup>S</sup> N <sup>P</sup> K <sup>D</sup> L <sup>R</sup> K <sup>L</sup> A<br>V <sup>S</sup> L <sup>A</sup> L <sup>W</sup> A <sup>F</sup> A <sup>S</sup> W <sup>N</sup> N <sup>C</sup> P <sup>K</sup> K <sup>G</sup> K <sup>G</sup> T <sup>E</sup> G <sup>G</sup> V <sup>E</sup>                                                                                                                                                                                                                                                                                                                                                                                                                                                                                                                                                                                                                                                                                                                                                                                                                                                                                                                                                                                                                                                                                                                                                                                                                                                                                                                                                                                                                                                                                                                                                                                                                                                                                                                                                                                                                                                                                                                                                                                                                                                                                                                                                                                                                                         | no tag                                                          |
| Cas7a sequence                            | M <sup>M</sup> Y <sup>V</sup> R <sup>I</sup> S <sup>G</sup> R <sup>I</sup> R <sup>L</sup> N <sup>A</sup> H <sup>S</sup> L <sup>N</sup> A <sup>Q</sup> G <sup>G</sup> G <sup>T</sup> N <sup>Y</sup> E <sup>I</sup> T <sup>K</sup> T <sup>K</sup> V <sup>T</sup> R <sup>T</sup> E <sup>N</sup> G <sup>W</sup> T <sup>V</sup><br>E <sup>V</sup> P <sup>A</sup> I <sup>T</sup> G <sup>N</sup> M <sup>L</sup> K <sup>H</sup> W <sup>H</sup> F <sup>V</sup> G <sup>F</sup> V <sup>D</sup> Y <sup>F</sup> K <sup>T</sup> P <sup>Y</sup> G <sup>V</sup> N <sup>L</sup> T <sup>E</sup> R <sup>A</sup> L <sup>Y</sup> N <sup>G</sup> T <sup>R</sup> F <sup>G</sup> Q<br>G <sup>E</sup> T <sup>T</sup> A <sup>T</sup> K <sup>A</sup> N <sup>G</sup> A <sup>T</sup> V <sup>Q</sup> L <sup>N</sup> D <sup>E</sup> A <sup>T</sup> I <sup>I</sup> K <sup>E</sup> L <sup>A</sup> D <sup>A</sup> D <sup>V</sup> H <sup>G</sup> F <sup>L</sup> A <sup>P</sup> K <sup>T</sup> G <sup>R</sup> R <sup>R</sup> V <sup>S</sup> L <sup>V</sup> K<br>A <sup>S</sup> F <sup>I</sup> L <sup>P</sup> T <sup>E</sup> D <sup>F</sup> I <sup>K</sup> E <sup>V</sup> E <sup>G</sup> E <sup>R</sup> L <sup>I</sup> T <sup>A</sup> I <sup>K</sup> H <sup>N</sup> R <sup>V</sup> D <sup>V</sup> D <sup>E</sup> K <sup>A</sup> I <sup>G</sup> S <sup>S</sup> K <sup>E</sup> G <sup>T</sup> A <sup>Q</sup> M <sup>L</sup> F<br>S <sup>R</sup> E <sup>Y</sup> A <sup>T</sup> G <sup>L</sup> Y <sup>G</sup> S <sup>I</sup> V <sup>L</sup> D <sup>L</sup> G <sup>L</sup> V <sup>G</sup> I <sup>P</sup> Q <sup>G</sup> L <sup>P</sup> V <sup>K</sup> F <sup>E</sup> E <sup>N</sup> Q <sup>R</sup> P <sup>R</sup> N <sup>I</sup> V <sup>D</sup> P <sup>N</sup> E <sup>R</sup> K <sup>A</sup><br>R <sup>I</sup> E <sup>S</sup> A <sup>L</sup> K <sup>A</sup> L <sup>I</sup> P <sup>M</sup> L <sup>S</sup> G <sup>Y</sup> I <sup>G</sup> A <sup>N</sup> L <sup>A</sup> R <sup>S</sup> F <sup>P</sup> V <sup>F</sup> K <sup>V</sup> E <sup>E</sup> L <sup>V</sup> A <sup>I</sup> A <sup>S</sup> E <sup>G</sup> P <sup>I</sup> P <sup>A</sup> L <sup>V</sup> H <sup>G</sup> F<br>Y <sup>E</sup> D <sup>Y</sup> I <sup>E</sup> A <sup>N</sup> R <sup>S</sup> I <sup>I</sup> K <sup>N</sup> A <sup>R</sup> A <sup>L</sup> G <sup>F</sup> N <sup>I</sup> E <sup>V</sup> F <sup>T</sup> Y <sup>N</sup> V <sup>D</sup> L <sup>G</sup> E <sup>D</sup> I <sup>E</sup> A <sup>T</sup> K <sup>V</sup> S <sup>S</sup> V <sup>E</sup> E <sup>L</sup> V <sup>A</sup> N<br>L <sup>V</sup> K <sup>M</sup> V <sup>G</sup> G <sup>K</sup> E                                                                                                                                                                                                                                                                                                                                                                                                                                                                | no tag                                                          |
| Cas5a sequence                            | M <sup>D</sup> I <sup>L</sup> L <sup>V</sup> C <sup>L</sup> R <sup>F</sup> P <sup>F</sup> F <sup>S</sup> V <sup>A</sup> K <sup>R</sup> S <sup>Y</sup> Q <sup>V</sup> R <sup>T</sup> S <sup>F</sup> L <sup>L</sup> P <sup>P</sup> P <sup>S</sup> A <sup>L</sup> K <sup>G</sup> A <sup>L</sup> A <sup>K</sup> G <sup>L</sup> L <sup>L</sup> K <sup>P</sup> E<br>K <sup>Y</sup> A <sup>S</sup> S <sup>S</sup> L <sup>D</sup> E <sup>A</sup> A <sup>L</sup> K <sup>A</sup> I <sup>K</sup> E <sup>I</sup> E <sup>S</sup> K <sup>L</sup> V <sup>D</sup> I <sup>K</sup> A <sup>V</sup> S <sup>V</sup> A <sup>P</sup> L <sup>S</sup> P <sup>L</sup> I <sup>R</sup> N <sup>A</sup> F <sup>L</sup> L <sup>K</sup> R <sup>L</sup> R <sup>N</sup> L <sup>E</sup><br>S <sup>G</sup> S <sup>N</sup> A <sup>E</sup> K <sup>S</sup> D <sup>A</sup> M <sup>R</sup> R <sup>E</sup> Y <sup>T</sup> F <sup>T</sup> R <sup>E</sup> L <sup>L</sup> V <sup>A</sup> I <sup>F</sup> K <sup>N</sup> L <sup>T</sup> Q <sup>E</sup> E <sup>K</sup> N <sup>L</sup> Y <sup>L</sup> K <sup>A</sup> A <sup>M</sup> L <sup>I</sup> D <sup>V</sup> I<br>G <sup>D</sup> T <sup>E</sup> S <sup>L</sup> A <sup>T</sup> P <sup>V</sup> W <sup>A</sup> S <sup>F</sup> V <sup>K</sup> P <sup>E</sup> D <sup>K</sup> K <sup>A</sup> P <sup>L</sup> A <sup>F</sup> S <sup>A</sup> P <sup>Y</sup> T <sup>E</sup> I <sup>Y</sup> S <sup>L</sup> L <sup>S</sup> S <sup>K</sup> I <sup>Q</sup> A <sup>K</sup> G <sup>K</sup> I <sup>R</sup><br>M <sup>Y</sup> I <sup>E</sup> K <sup>M</sup> R <sup>V</sup> S <sup>P</sup> E <sup>Y</sup> S <sup>K</sup> T <sup>K</sup> G <sup>P</sup> Q <sup>E</sup> E <sup>I</sup> F <sup>Y</sup> L <sup>P</sup> I <sup>E</sup> R <sup>R</sup> Y <sup>K</sup> R <sup>I</sup> V <sup>Y</sup> Y <sup>A</sup> R <sup>T</sup> I <sup>Y</sup> P <sup>P</sup> E <sup>V</sup> E<br>K <sup>A</sup> L <sup>T</sup> V <sup>D</sup> G <sup>E</sup> V <sup>L</sup> G <sup>I</sup> W <sup>I</sup> P <sup>K</sup> N <sup>S</sup> S <sup>E</sup> S <sup>G</sup> S <sup>H</sup> H <sup>H</sup> H <sup>H</sup> H <sup>H</sup> H                                                                                                                                                                                                                                                                                                                                                                                                                                                                                                                                                                                                                                                                                                                                                                                                                                                                                                                                            | no tag                                                          |
| <i>E. coli</i> Cas6e for crRNA processing | M <sup>Y</sup> L <sup>S</sup> K <sup>V</sup> I <sup>A</sup> R <sup>A</sup> W <sup>S</sup> R <sup>D</sup> L <sup>Y</sup> Q <sup>L</sup> H <sup>Q</sup> G <sup>L</sup> W <sup>H</sup> L <sup>F</sup> P <sup>N</sup> R <sup>P</sup> D <sup>A</sup> A <sup>R</sup> D <sup>F</sup> L <sup>F</sup> H <sup>V</sup> E <sup>K</sup> R <sup>N</sup> T<br>P <sup>E</sup> G <sup>C</sup> H <sup>V</sup> L <sup>L</sup> Q <sup>S</sup> A <sup>Q</sup> M <sup>P</sup> V <sup>S</sup> T <sup>A</sup> V <sup>A</sup> T <sup>V</sup> I <sup>K</sup> T <sup>Q</sup> V <sup>E</sup> F <sup>Q</sup> L <sup>Q</sup> V <sup>G</sup> V <sup>P</sup> L <sup>Y</sup> F <sup>R</sup> L <sup>R</sup> A <sup>N</sup> P <sup>I</sup><br>K <sup>T</sup> I <sup>L</sup> D <sup>N</sup> Q <sup>K</sup> R <sup>L</sup> D <sup>S</sup> K <sup>G</sup> N <sup>I</sup> K <sup>R</sup> C <sup>R</sup> V <sup>P</sup> L <sup>I</sup> K <sup>E</sup> A <sup>E</sup> Q <sup>I</sup> A <sup>W</sup> L <sup>Q</sup> R <sup>K</sup> L <sup>G</sup> N <sup>A</sup> A <sup>R</sup> V <sup>E</sup> D <sup>V</sup> H<br>P <sup>I</sup> S <sup>E</sup> R <sup>P</sup> Q <sup>Y</sup> F <sup>S</sup> G <sup>D</sup> G <sup>K</sup> S <sup>G</sup> K <sup>I</sup> Q <sup>T</sup> V <sup>C</sup> F <sup>E</sup> G <sup>V</sup> L <sup>T</sup> I <sup>N</sup> D <sup>A</sup> P <sup>A</sup> L <sup>I</sup> D <sup>L</sup> V <sup>Q</sup> Q <sup>G</sup> I <sup>G</sup> P <sup>A</sup> K <sup>S</sup><br>M <sup>G</sup> C <sup>G</sup> L <sup>L</sup> S <sup>L</sup> A <sup>P</sup> L                                                                                                                                                                                                                                                                                                                                                                                                                                                                                                                                                                                                                                                                                                                                                                                                                                                                                                                                                                                                                                                                                                                                                                                                                                                                                                                                                                                                                                                                                                             | no tag                                                          |
| Cas3_HEL                                  | M <sup>G</sup> S <sup>S</sup> H <sup>H</sup> H <sup>H</sup> H <sup>H</sup> H <sup>H</sup> S <sup>Q</sup> L <sup>E</sup> V <sup>L</sup> F <sup>Q</sup> G <sup>P</sup> L <sup>D</sup> T <sup>E</sup> K <sup>L</sup> F <sup>R</sup> E <sup>L</sup> T <sup>G</sup> F <sup>E</sup> P <sup>Y</sup> D <sup>Y</sup> Q <sup>L</sup> R <sup>A</sup> W <sup>E</sup> K <sup>I</sup>                                                                                                                                                                                                                                                                                                                                                                                                                                                                                                                                                                                                                                                                                                                                                                                                                                                                                                                                                                                                                                                                                                                                                                                                                                                                                                                                                                                                                                                                                                                                                                                                                                                                                                                                                                                                                                                                                                                                                                                                                                                                                                                                                                                                                                                                                                                                                                                                                                                                                                                                                                                                                                                                      | His tag-3C site-Cas3HEL                                         |

|         |                                                                                                                                                                                                                                                                                                                                                                                                                                                                                                                                                                                                                                                                                                         |                            |
|---------|---------------------------------------------------------------------------------------------------------------------------------------------------------------------------------------------------------------------------------------------------------------------------------------------------------------------------------------------------------------------------------------------------------------------------------------------------------------------------------------------------------------------------------------------------------------------------------------------------------------------------------------------------------------------------------------------------------|----------------------------|
|         | REIMNNGGKVIIEVPTAGGKTETAVMPFFAGIYNNNWPVARLVYVLP<br>TRSLVEKQAERLRNLVYKLLQLKGKSKEEAELARELVVVEYGLEKT<br>HAFLGWVVVTTWDAFLYGLAAHRTVGNRFTFPAGAIASLIVFDEV<br>QMYQDESMYMPRLLSLVVGILEEANVPLVIMSATIPSKLREMIAGDT<br>EVITVDKNDKNKPSRGNVVKVRLVEGDITDVLNDIKKILKNGKVLVVR<br>NTVRKAVETYQVLKKKLNNTLANPSDALLIHSRFTIGDRREKERALD<br>SARLIVATQVVEAGLDLPNVLVVTDIAPLDALIQRIGRCARRPGEEG<br>EGIILPVENCIEHEKIVRGLSELMKIGEDTVVFATVTSTNEYDRVVEI<br>HYGEGKKNFVYVGDIDTARRVLEKKRSKLPKDLYIIPYSVSPYDPLV<br>LLTTYDELSKIGEYLADTTKARKALDRVYKFHYENNIVPKEFASAYIYF<br>KELKLFSAPEYELRSRPELYVLLYPMNIEKNERVEDKVIDNLETARII<br>RISYSVKEWKKSDVVIGRLMKEWDKNAEKWWWKVRKSFKIDPYEYIY<br>VIDAKYYNSELGFITNLSDTNSHTDSDSKVRTRNSEHSSKKNRSKG<br>KKGQTSLENWGVVRV |                            |
| Cas3_HD | MGSSHHHHHSQLEVLFGQPLGSSCKAFQGQTLREHIEAMLAWE<br>IVKNKYIPSIIRVMKTGVKFTTEEDADKFMKTLIILHDVKGKCEVYQK<br>HLSNNEPLRGFRHELVSAYYAYNILKDMFKDETIAFIGALVMMHHE<br>PILMGQIRSLDKEELTPEVLDKLRFTFNGVMEGTESFIKSMIKEKLGV<br>IPKVPSPQEDVLRVIRLSVLARHRPDSGKLRMVVGALLIPLVLCDY<br>KGAKEREGESPKFAEVLRVEMMK                                                                                                                                                                                                                                                                                                                                                                                                                      | His tag-3C site-<br>Cas3HD |
